# Supplementary material for: The “ins and outs” of electropolymerized PEDOT organic electrochemical transistors
Source: Research Square preprint supplement (doi:10.21203/rs.3.rs-5390816/v1), 2024-11-21
Supplement: Supplementary file 1 [file 8b2d591c3b337b92fc1b122b.docx]

Supporting Information

Table S1: State of the art of OECTs fabricated by electrodeposition

| Material | Polymerization mode | Configuration | Transconductance | References |
| --- | --- | --- | --- | --- |
| Polypyrrole | Potentiostatic | planer | - | 1 |
| Polyaniline | Potentiostatic | planar | - | 2 |
| P3MTa) | Potentiodynamic | planar | - | 3,4 |
| PETE-Sb) | Potentiostatic deposition | planar | 5.2 mS | 5-7 |
| P(EDOT-ran-EDOTOH):ClO4 | Potentiostatic deposition | planar | 2.36 mS | 8 |
| PEDOT with azide (-N3) or ethynyl (-E):PF6/ClO4 | Potentiodynamic | planar | 2~55 mS | 9-11 |
| PEDOT:PF6 | AC | planar | - | 12 |
| PEDOT:PSS | AC bipolar | planar | ≤ 2.5 μS | 13,14 |
| PEDOT:PSS | AC bipolar | Planar array | 0.77 ± 0.01 mS | 15 |
| PEDOT:PSS | Potentiostatic | planar | ≤ 1 mS | 16 |
| Poly (EDOT-COOH-co-EDOT-PC)/PEDOT:PSS | Potentiodynamic | planar | 4 mS | 17 |
| PEDOT:PF6 | Galvanostatic | vertical | 68 mS | 18 |
| PEDOT:ClO4,  PEDOT:pTS  PEDOT:PSS | Galvanostatic | planar | 27~46 mS | 19 |

Note: a) Poly(3-methylthiophene)

b) Poly[4-(2-(2,5-bis(2,3-dihydrothieno[3,4-b][1,4]dioxin-5-yl) thiophen-3-yl)ethoxy)butane-1-sulfonate]

Table S2. Composition of the electrolyte solutions used for electrodeposition.

| PEDOT film | Dopant | Dopant concentration (mM) | Solvent |
| --- | --- | --- | --- |
| PEDOT:ClO4 | LiClO4 | 100, 5 and 1 | acetonitrile |
| PEDOT:BF4 | LiBF4 | 100 and 5 | acetonitrile |
| PEDOT:BF4 | TEABF4 | 100 and 5 | acetonitrile |
| PEDOT:PSS | NaPSS | 100 | acetonitrile/water (4/1 vol) |


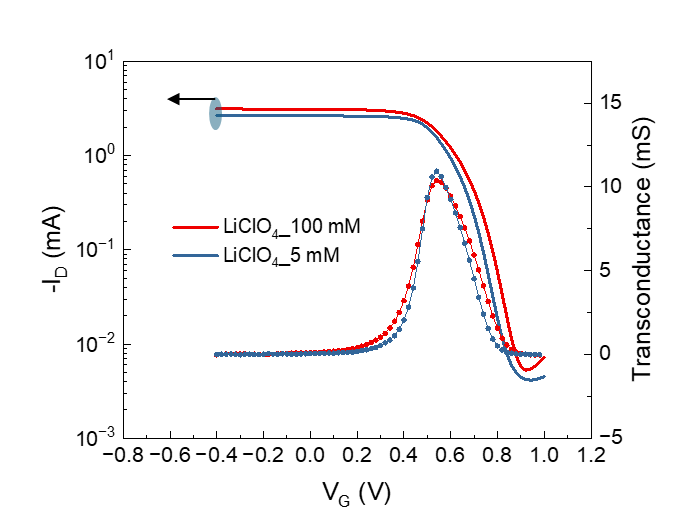


**Figure S1.** Transfer characteristics of PEDOT:ClO4 OECTs deposited under different dopant concentrations of 100mM and 5 mM.


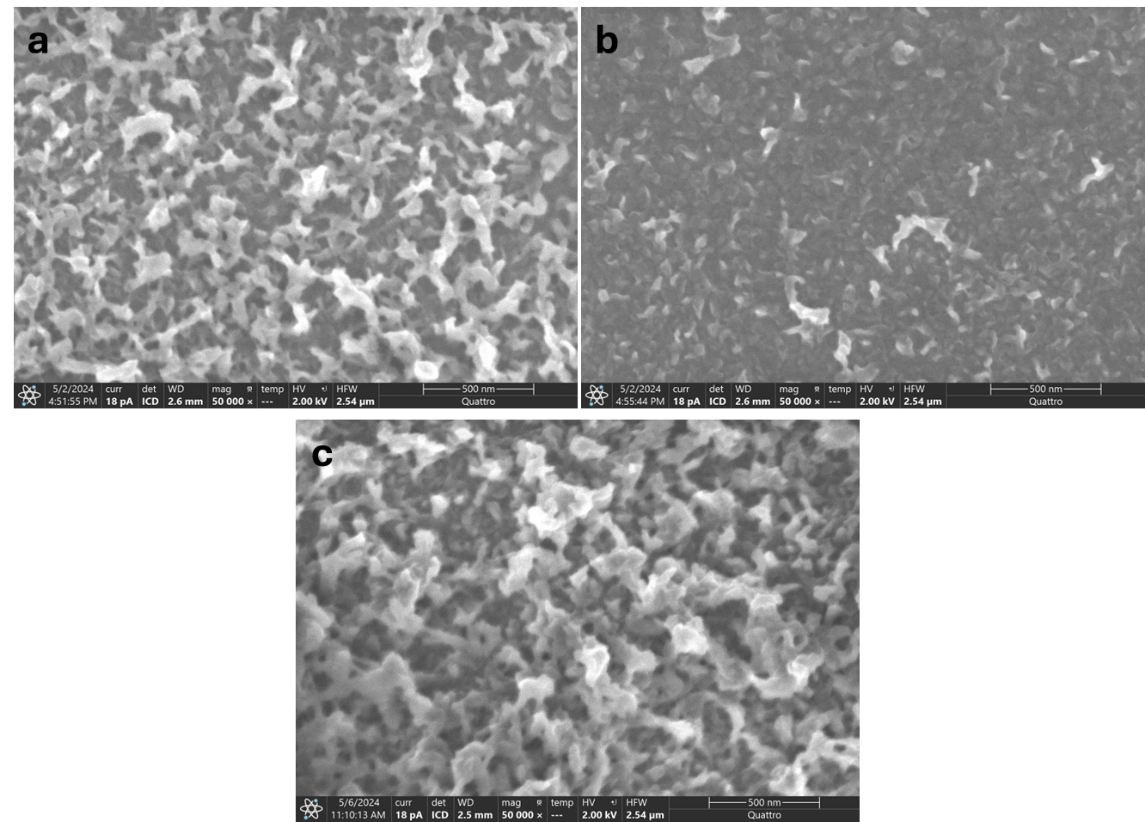


**Figure S2.** SEM images of PEDOT:ClO4 films electropolymerized at charge densities of 30 mC/cm2 **a** on gold electrode and **b** in channel area; **c** electropolymerized at charge densities of 60 mC/cm2.


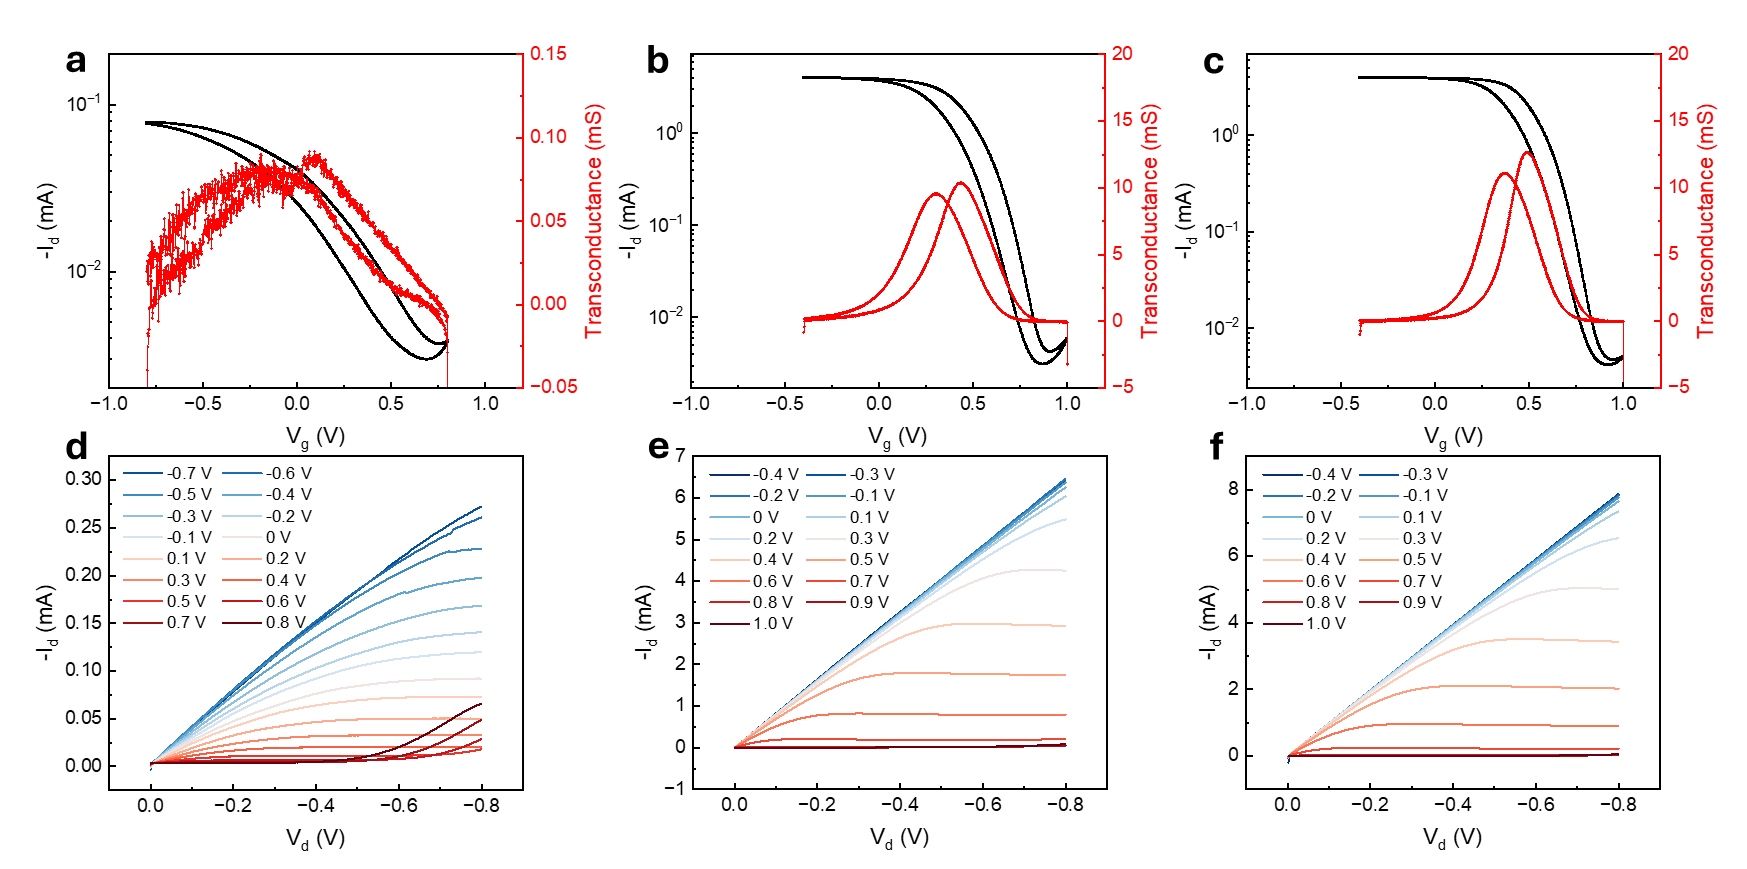


**Figure S3.** Transfer (ID-VG) characteristics and output (ID-VD) characteristics for electropolymerized PEDOT:ClO4 OECTs under the deposition of charge density: **a, d** 15 mC/cm2; **b, e** 30 mC/cm2; **c, f** 60 mC/cm2.


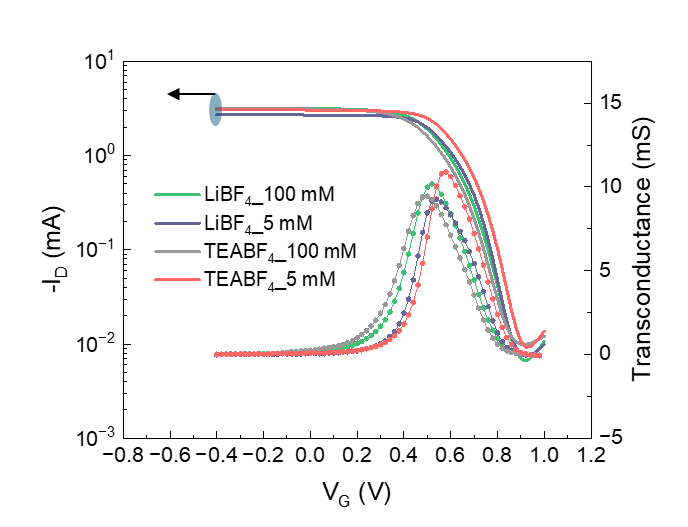


**Figure S4.** Transfer characteristics (ID-VG) of PEDOT:BF4-based OECTs deposited using LiBF4 and TEABF4 as dopants under different dopant concentrations of 100mM and 5 mM.


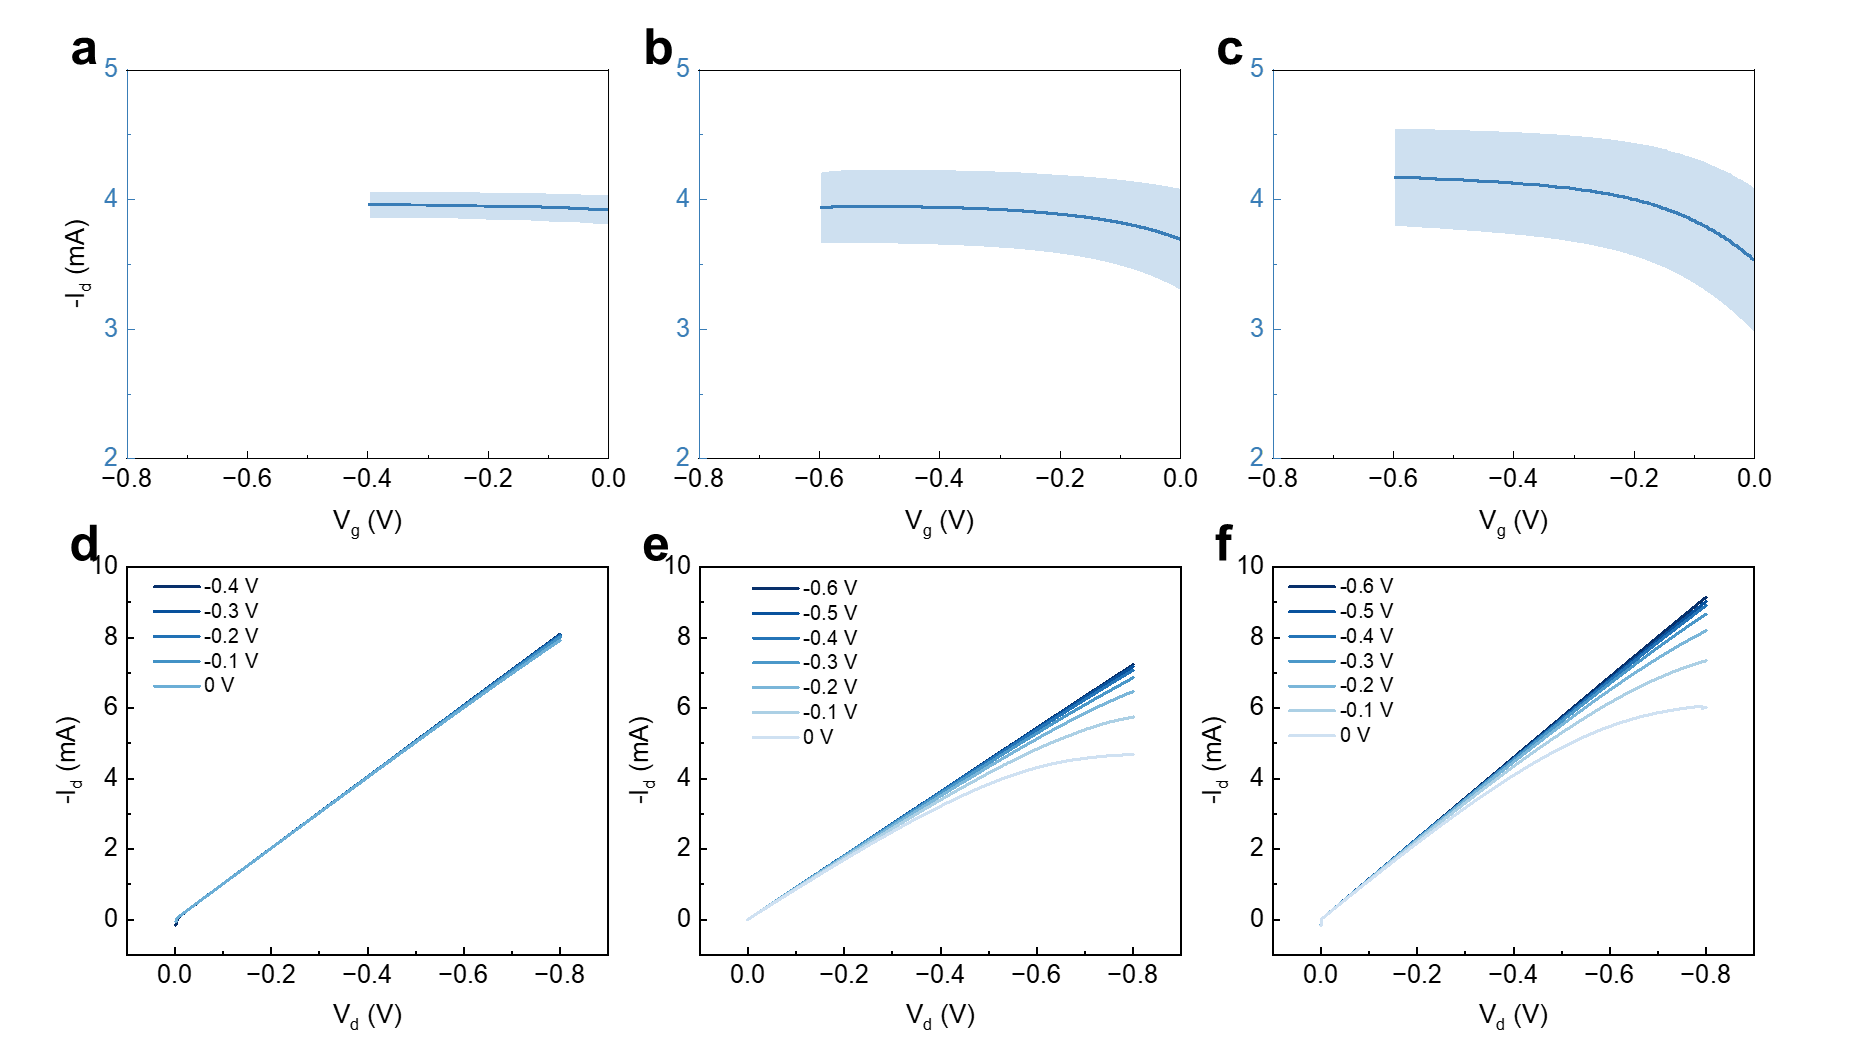


**Figure S5.** Transfer (ID-VG) characteristics and output (ID-VD) characteristics plotted within a VG range below 0 V for OECTs based on: **a, d** electropolymerized PEDOT:ClO4 with deposition charge density of 60 mC/cm2; **b, e** electropolymerized PEDOT:PSS with deposition charge density of 300 mC/cm2; **c, f** ink-jet printed PEDOT:PSS.


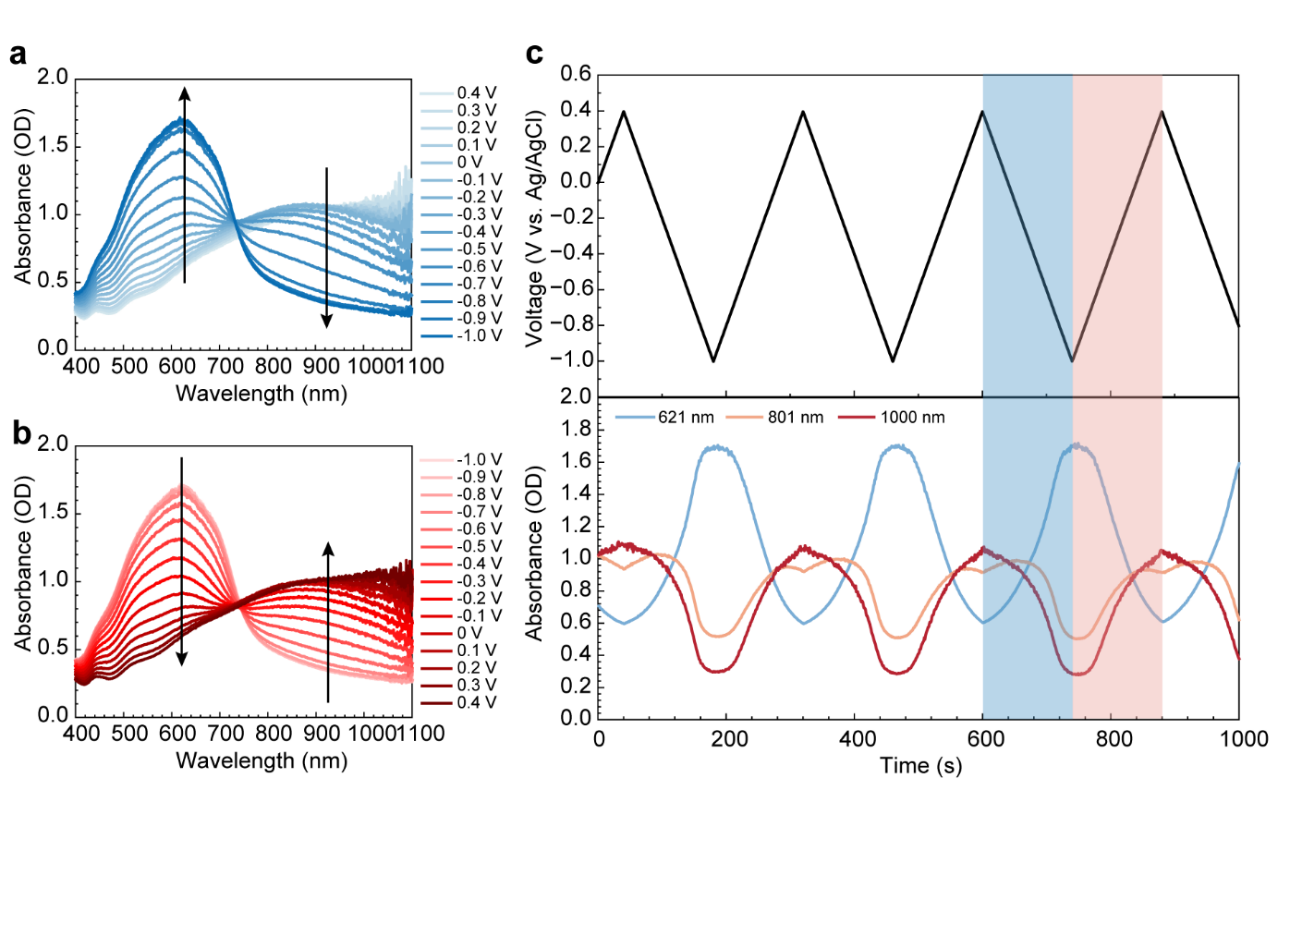


**Figure S6.** Spectroelectrochemical measurements of PEDOT:ClO4 films electrodeposited from a 5mM dopant solution. Real time spectra during the **a** dedoping and **b** redoping processes between +0.4 V to -1.0 V presented with 0.1 V increments. **c** top layer: voltage sweep, lower layer: temporal behaviour of three wavelengths chosen as representative of neutral chains (621 nm), polarons (801 nm), and polarons + bipolarons (1000 nm).


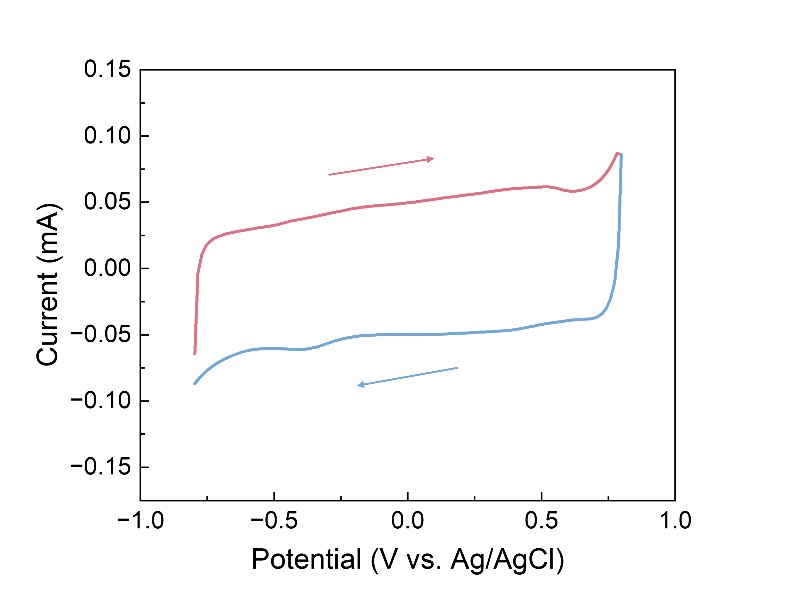


**Figure S7.** Cyclic voltammetry curve for PEDOT:PSS under degassing condition.


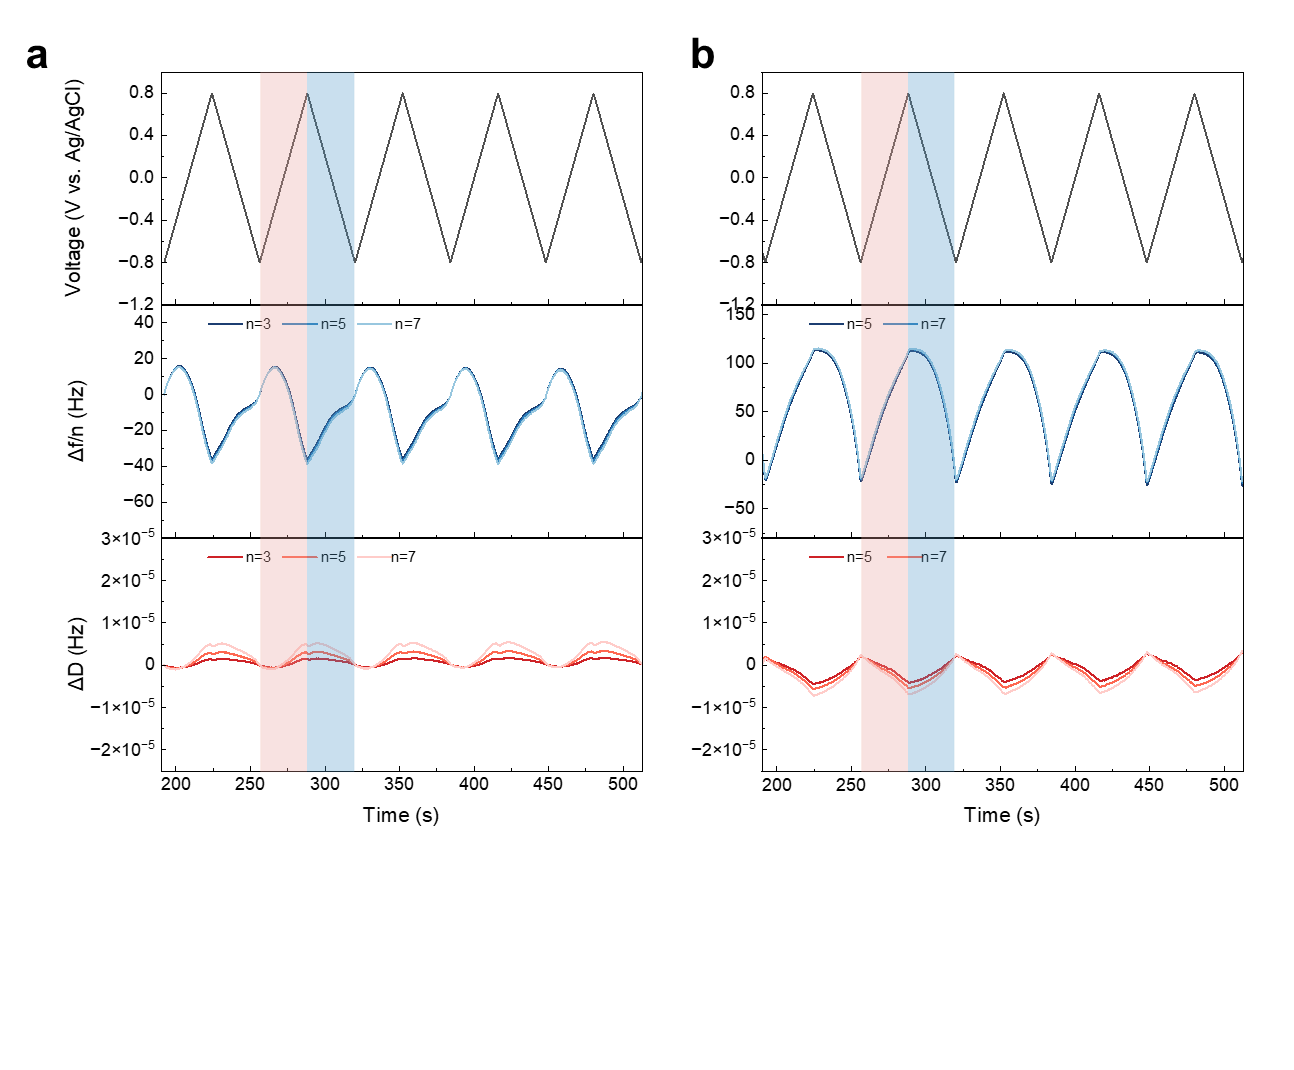


**Figure S8.** EQCM-D measurements for PEDOT:ClO4 and PEDOT:PSS films. Frequency (Δf/n) and Dissipation (ΔD) responses of the third, fifth and seventh overtones under cycled linear potential sweep for **a** 30 s coated PEDOT:ClO4 and **b** 30 s coated PEDOT:PSS. The potential is applied between -0.8 V to 0.8 V at a scan rate of 50 mV/s.


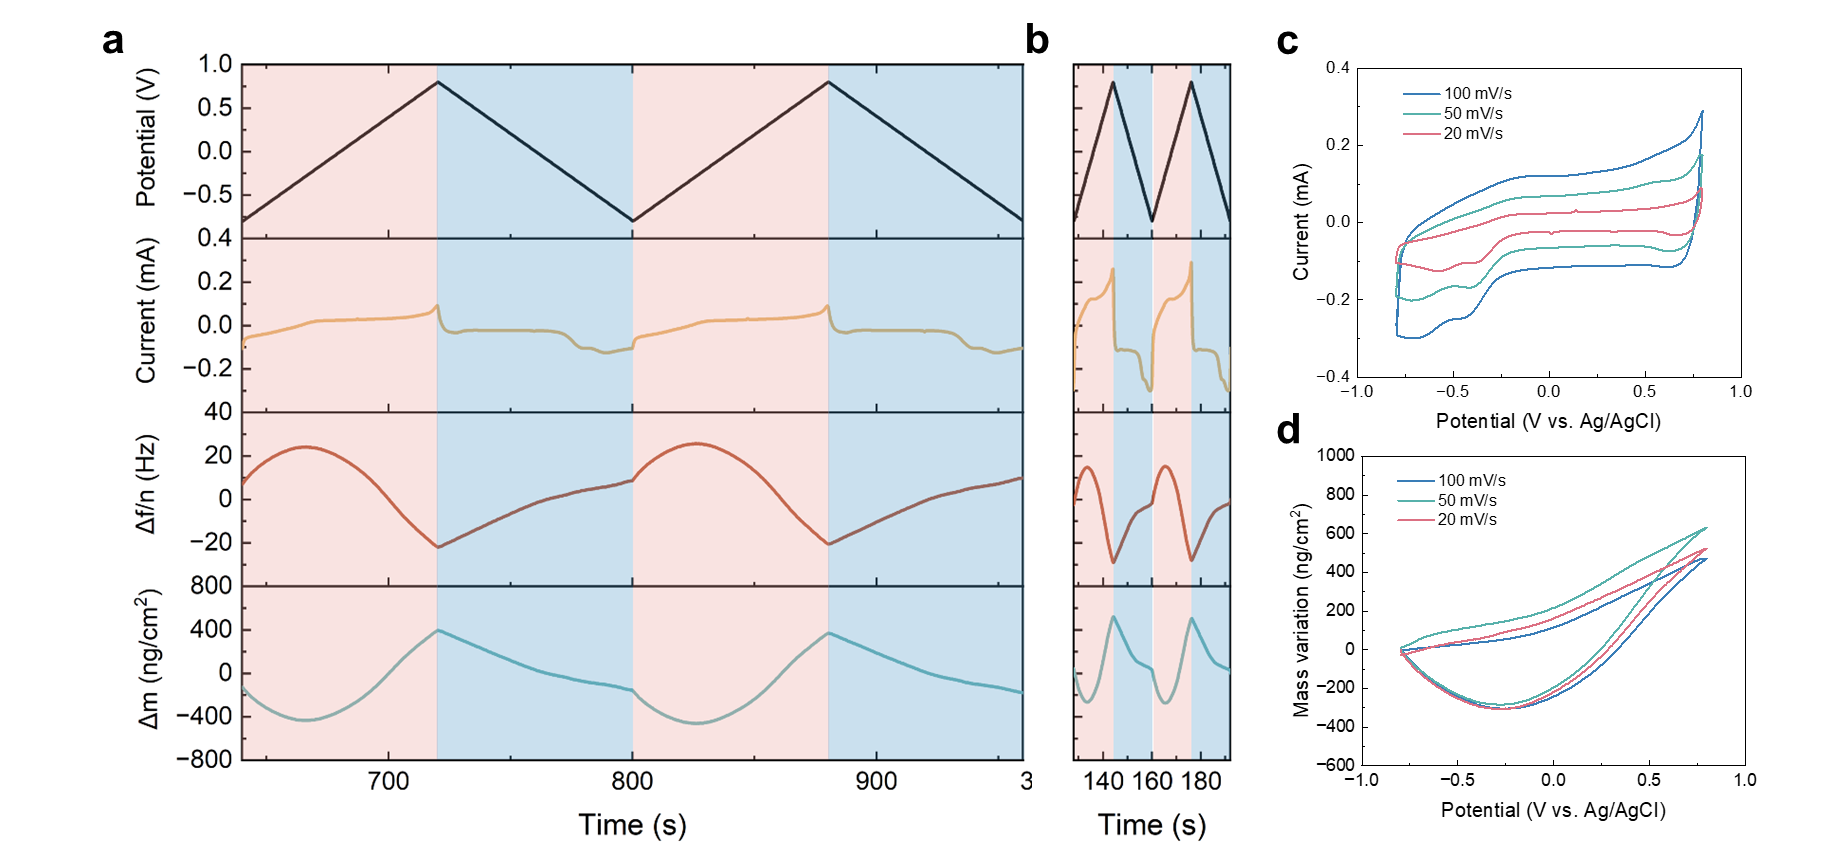


**Figure S9.** EQCM-D results for 30 s coated PEDOT:ClO4 film at different scan rates. Current (I), Frequency (Δf/n) response and calculated mass shift (Δm) of the third overtone under cycled linear potential sweep at the scan rate of **a** 20 mV/s and **b** 100 mV/s. **c** CV curves and **d** mass variation vs. voltage at different scan rates.


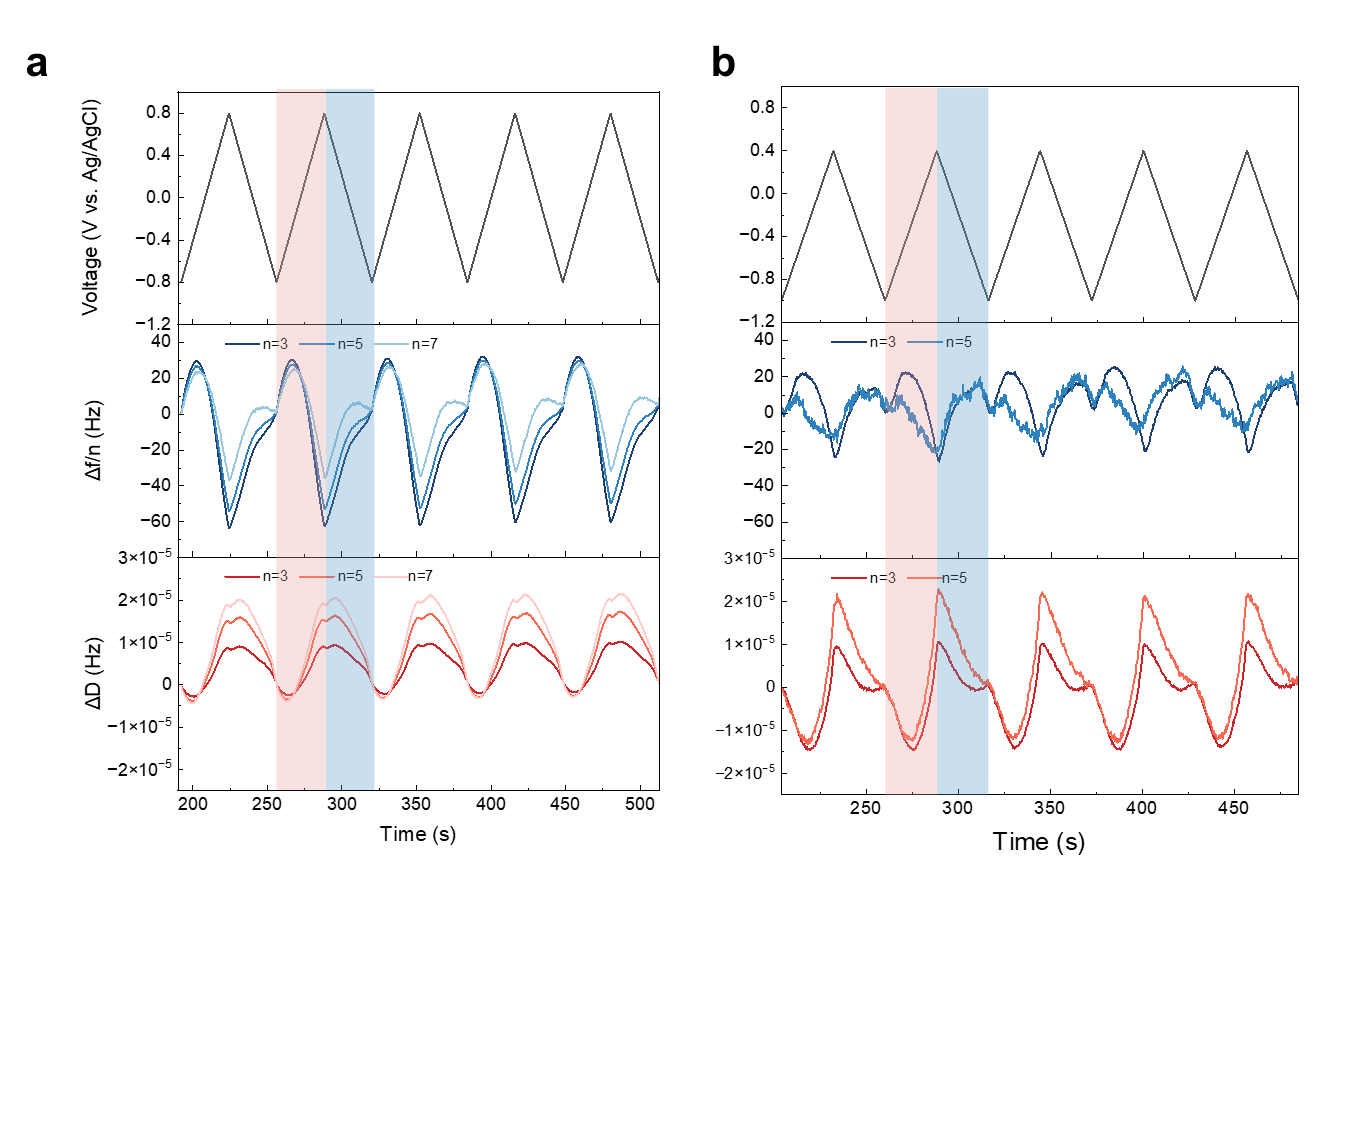


**Figure S10.** EQCM-D measurements for PEDOT:ClO4 films. Frequency (Δf/n) and Dissipation (ΔD) responses of the third, fifth and seventh overtones under cycled linear potential sweep for **a** 60 s coated PEDOT:ClO4 and **b** 120 s coated PEDOT:ClO4. The potential is applied between -0.8 V to 0.8 V at a scan rate of 50 mV/s.

**References:**

1 White, H. S., Kittlesen, G. P. & Wrighton, M. S. Chemical derivatization of an array of three gold microelectrodes with polypyrrole: fabrication of a molecule-based transistor. *Journal of the American Chemical Society* **106**, 5375-5377 (1984).

2 Paul, E. W., Ricco, A. J. & Wrighton, M. S. Resistance of polyaniline films as a function of electrochemical potential and the fabrication of polyaniline-based microelectronic devices. *The Journal of Physical Chemistry* **89**, 1441-1447 (1985).

3 Thackeray, J. W., White, H. S. & Wrighton, M. S. Poly (3-methylthiophene)-coated electrodes: optical and electrical properties as a function of redox potential and amplification of electrical and chemical signals using poly (3-methylthiophene)-based microelectrochemical transistors. *The Journal of Physical Chemistry* **89**, 5133-5140 (1985).

4 Thackeray, J. W. & Wrighton, M. S. Chemically responsive microelectrochemical devices based on platinized poly (3-methylthiophene): variation in conductivity with variation in hydrogen, oxygen, or pH in aqueous solution. *The Journal of Physical Chemistry* **90**, 6674-6679 (1986).

5 Gerasimov, J. Y. *et al.* An Evolvable Organic Electrochemical Transistor for Neuromorphic Applications. *Advanced Science* **6**, 1801339 (2019). <https://doi.org:10.1002/advs.201801339>

6 Gerasimov, J. Y. *et al.* A Biomimetic Evolvable Organic Electrochemical Transistor. *Advanced Electronic Materials* **7** (2021). <https://doi.org:10.1002/aelm.202001126>

7 Harikesh, P. C. *et al.* Organic electrochemical neurons and synapses with ion mediated spiking. *Nature Communications* **13**, 901 (2022). <https://doi.org:10.1038/s41467-022-28483-6>

8 Wustoni, S. *et al.* In Situ Electrochemical Synthesis of a Conducting Polymer Composite for Multimetabolite Sensing. *Advanced Materials Technologies* **5** (2019). <https://doi.org:10.1002/admt.201900943>

9 Fenoy, G. E. *et al.* "Clickable" Organic Electrochemical Transistors. *Journal of the American Chemical Society* **2**, 2778-2790 (2022). <https://doi.org:10.1021/jacsau.2c00515>

10 Fenoy, G. E. *et al.* Interface Engineering of "Clickable" Organic Electrochemical Transistors toward Biosensing Devices. *ACS Applied Materials & Interfaces* **15**, 10885-10896 (2023). <https://doi.org:10.1021/acsami.2c21493>

11 Fenoy, G. E. *et al.* A Poly(3,4-ethylenedioxythiophene) Derivative Incorporating Ethynyl Moieties for Click Chemistry-Based Bioelectronics. *Chemistry of Materials* **36**, 7207-7221 (2024). <https://doi.org:10.1021/acs.chemmater.4c00989>

12 Cucchi, M. *et al.* Directed Growth of Dendritic Polymer Networks for Organic Electrochemical Transistors and Artificial Synapses. *Advanced Electronic Materials* **7** (2021). <https://doi.org:10.1002/aelm.202100586>

13 Janzakova, K. *et al.* Dendritic Organic Electrochemical Transistors Grown by Electropolymerization for 3D Neuromorphic Engineering. *Advanced Science* **8**, e2102973 (2021). <https://doi.org:10.1002/advs.202102973>

14 Janzakova, K. *et al.* Analog programing of conducting-polymer dendritic interconnections and control of their morphology. *Nature Communications* **12**, 6898 (2021). <https://doi.org:10.1038/s41467-021-27274-9>

15 Ji, J. *et al.* Bipolar electrodeposition of organic electrochemical transistor arrays. *Journal of Materials Chemistry C* **8**, 11499-11507 (2020). <https://doi.org:10.1039/d0tc00436g>

16 Ghazal, M. *et al.* Bio‐Inspired Adaptive Sensing through Electropolymerization of Organic Electrochemical Transistors. *Advanced Electronic Materials* **8** (2021). <https://doi.org:10.1002/aelm.202100891>

17 Zhang, S. *et al.* Intrinsically Antifouling, soft and conformal bioelectronic from scalable fabrication of Thin-Film OECT arrays by zwitterionic polymers. *Chemical Engineering Journal* **483** (2024). <https://doi.org:10.1016/j.cej.2024.148980>

18 Brodsky, J. *et al.* Downsizing the Channel Length of Vertical Organic Electrochemical Transistors. *ACS Applied Materials & Interfaces* **15**, 27002-27009 (2023). <https://doi.org:10.1021/acsami.3c02049>

19 Lee, J. *et al.* Electrochemical Fabrication and Characterization of Organic Electrochemical Transistors Using poly(3,4-ethylenedioxythiophene) with Various Counterions. *ACS Applied Materials & Interfaces* **14**, 42289-42297 (2022). <https://doi.org:10.1021/acsami.2c10149>
